# Supplementary material
Source: publisher figshare collection journal article supplement (https://karger.figshare.com/ndownloader/files/24692276)
Supplement: Supplementary file 1 [file 24692276]

|  | **Time *β (*SE)** | **Posture *β (*SE)** | **Interaction *β (*SE)** |
| --- | --- | --- | --- |
| **cfPWV, m/s** | **0.51 (0.21)**  **p=0.018** | N/M | N/M |
| **crPWV, m/s** | 0.25 (0.17) p=0.143 | **0.39 (0.15)** **p=0.010** | -0.03 (0.16) p=0.837 |
| **caPWV, m/s** | 0.07(0.29) p=0.806 | **1.71 (0.20) p<0.001** | -0.04±0.22 p=0.848) |

**Supplemental Table 2**. PWV responses by time, posture, and their interaction, adjusting for HR and SBP.

Abbreviations: N/M: not measured; SE: standard error;

Bold indicates significant change (p < 0.05).
